# Supplementary material
Source: publisher figshare collection journal article supplement (https://rs.figshare.com/ndownloader/files/17890628)

Supplementary Figure 7. Multispecies coalescent topology of the 75% complete dataset of well performing toepads and tissues, estimated with 10 million quartets in SVDquartets with 100 BS support. Black circles indicate  $\geq 95\%$ , grey circles indicate  $\geq 75\text{--}94\%$ , and white indicate  $\leq 74\%$  bootstrap support.

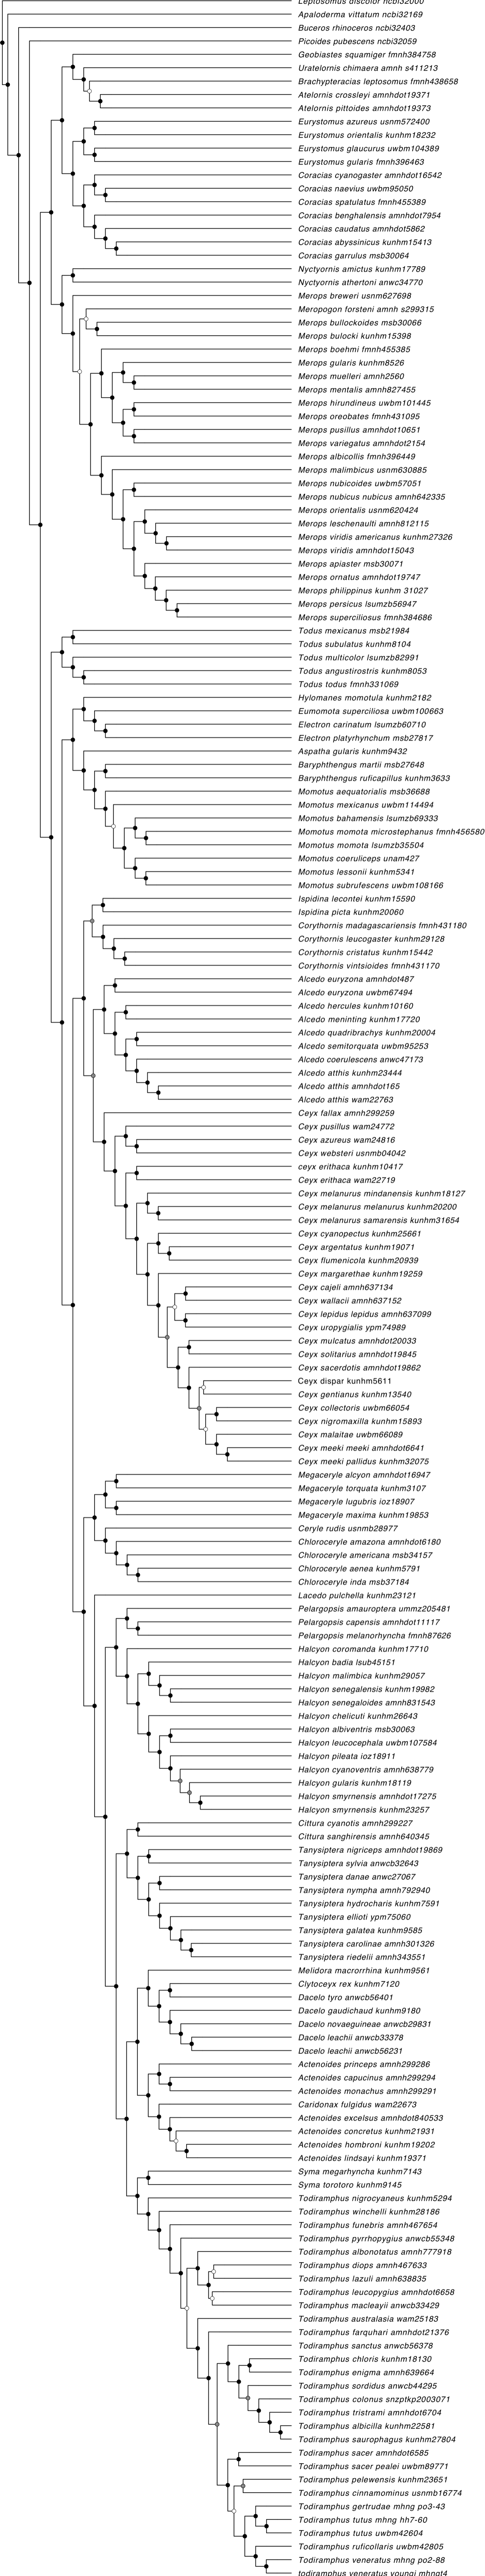

Supplement: Supplementary file 1 [file 17890628]
